# Supplementary material for: Histone H2AK119 Mono-Ubiquitination Is Essential for Polycomb-Mediated Transcriptional Repression
Source: PubMed Central journal article supplement (PMC7033561; doi:10.1016/j.molcel.2019.11.021), 2020-02-20
Supplement: mmc1.pdf [file mmc1.pdf]

**Molecular Cell, Volume 77**

**Supplemental Information**

**Histone H2AK119 Mono-Ubiquitination Is Essential  
for Polycomb-Mediated Transcriptional Repression**

**Simone Tamburri, Elisa Lavarone, Daniel Fernández-Pérez, Eric Conway, Marika Zanotti, Daria Manganaro, and Diego Pasini**

**Figure S1**

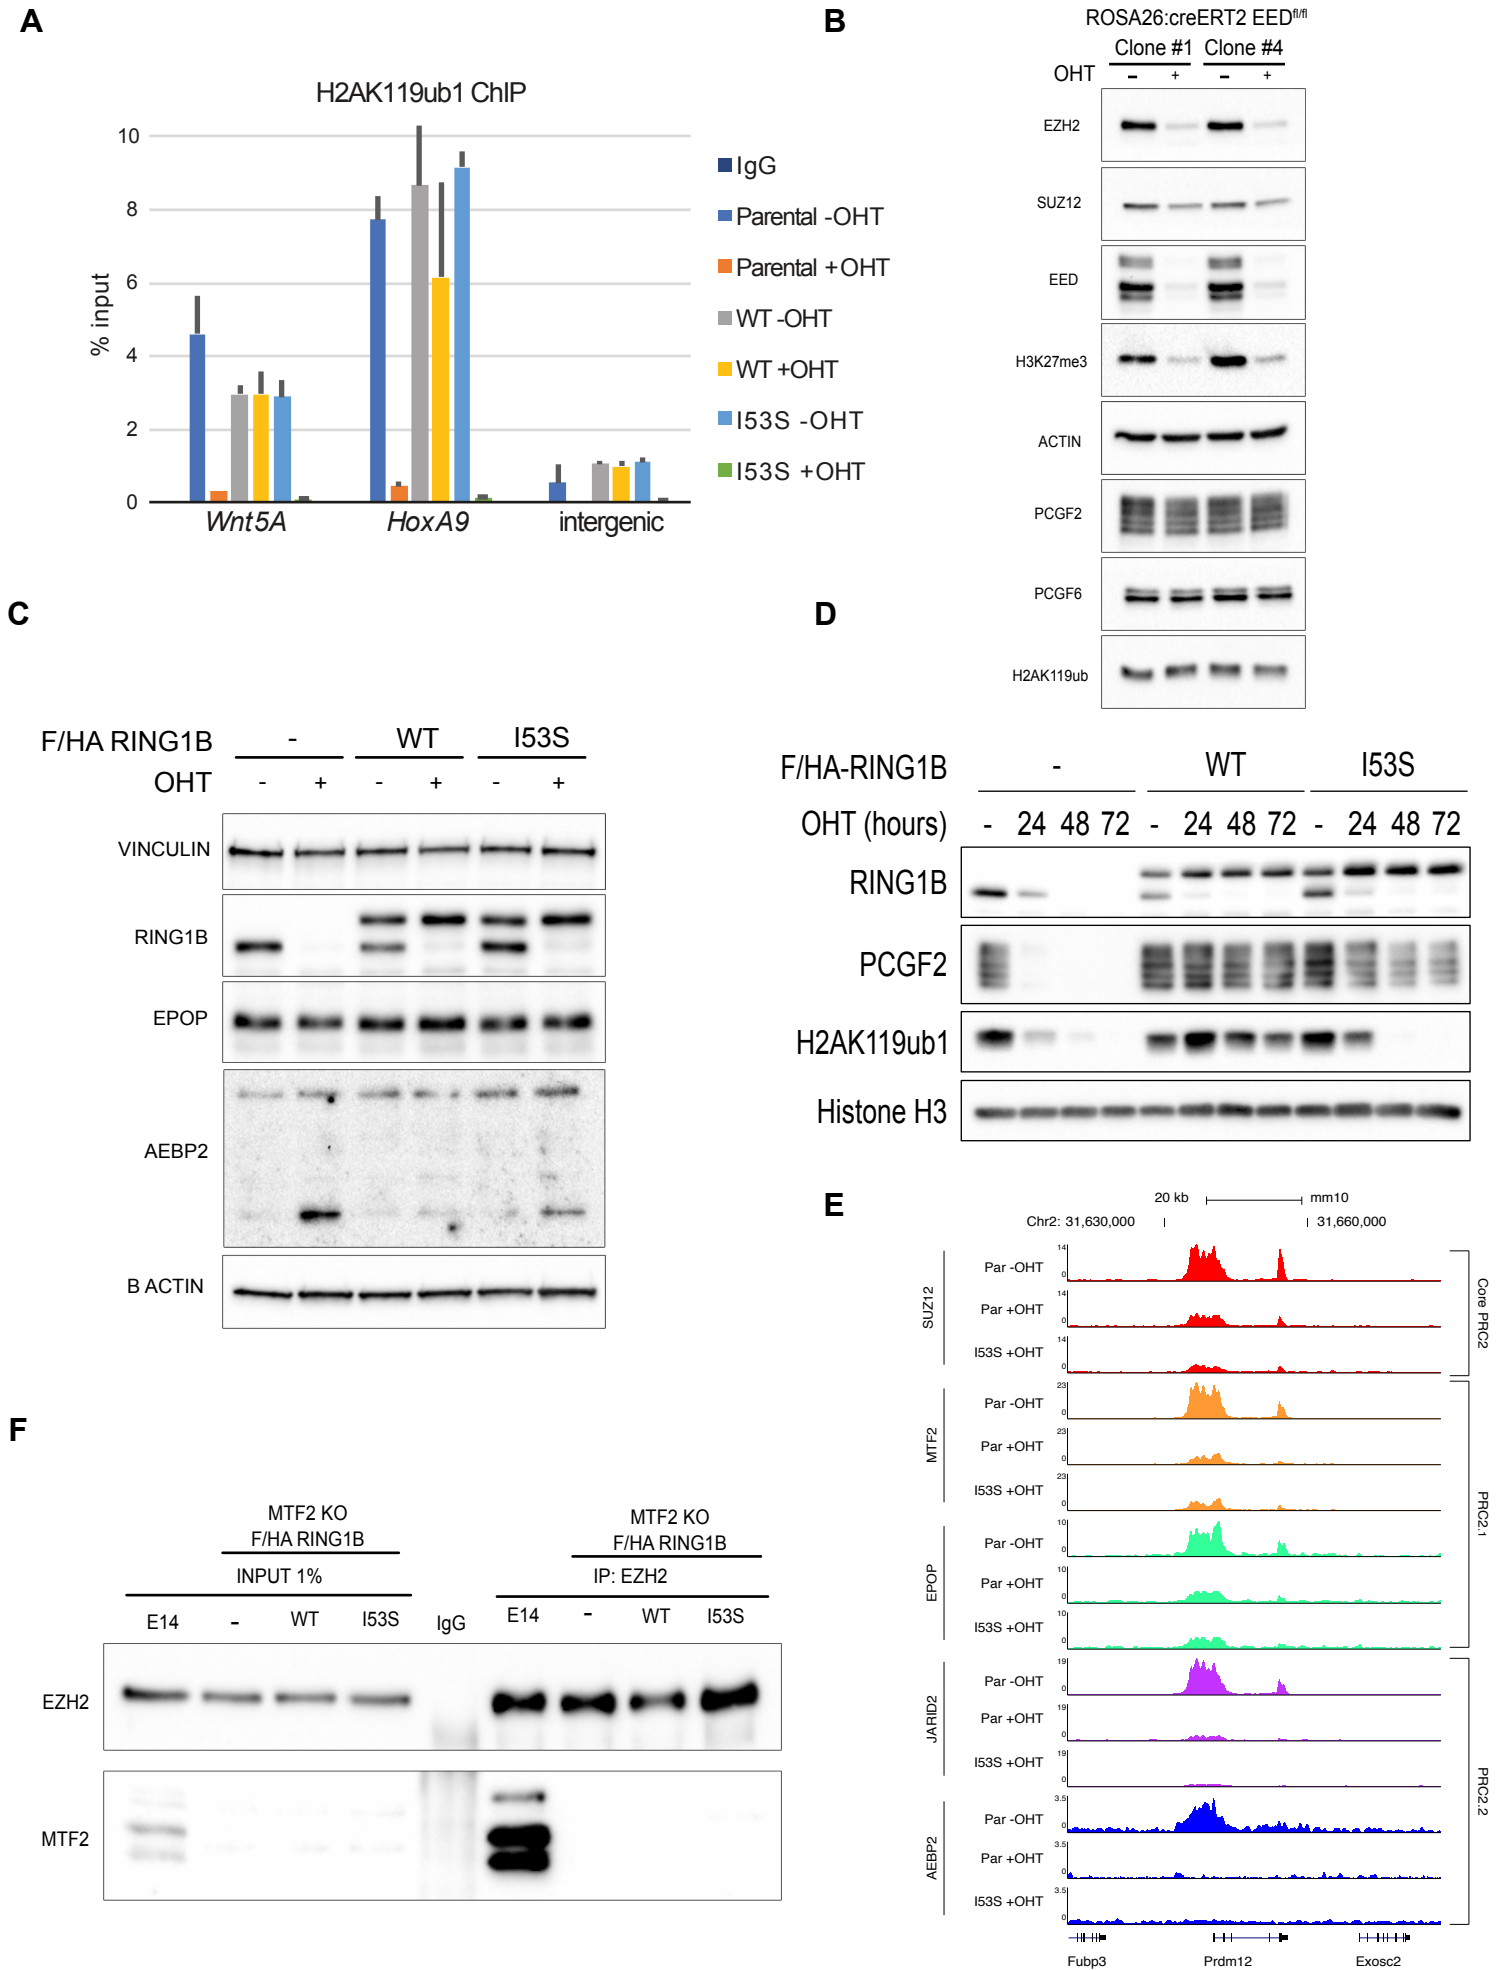

**Figure S1. Related to Figure 1 to 6.**

**(A)** ChIP-qPCR analysis of H2AK119ub1 in the indicated cell lines at two specific Polycomb targets and one intergenic region. IgG served as a negative control. Related to Figure 1.

**(B)** Western blot analysis with the indicated antibodies of total protein extracts obtained from the specified cell lines upon 72 hours of treatment with OHT (+OHT) or EtOH (-OHT). ACTIN was used as a loading control. Related to Figure 2.

**(C)** Western blot analysis with the indicated antibodies of total protein extracts obtained from the specified cell lines upon 72 hours of treatment with OHT (+OHT) or EtOH (-OHT). ACTIN and VINCULIN were used as a loading control. Related to Figure 3.

**(D)** Western blot analysis with the indicated antibodies of total protein extracts obtained from the specified cell lines at the indicated time of treatment with OHT (+OHT) or EtOH (-OHT). H3 was used as a loading control. Related to Figure 4.

**(E)** Representative genomic snapshots of ChIP tracks of the indicated proteins at the PRDM12 gene locus. Related to Figure 4.

**(F)** Co-immunoprecipitation analysis of total extracts derived from parental and FLAG-HA (F/HA) -tagged RING1B WT or I53S expressing cells upon 72 hours of treatment with OHT (+OHT) or EtOH (-OHT) using EZH2 antibody crosslinked to HA beads. E14 mESCs served as positive control for MTF2 co-immunoprecipitation upon EZH2 IP. IgG-IPs in E14 mESCs cells served as a negative control. Related to Figure 5.

**Figure S2**

**A**

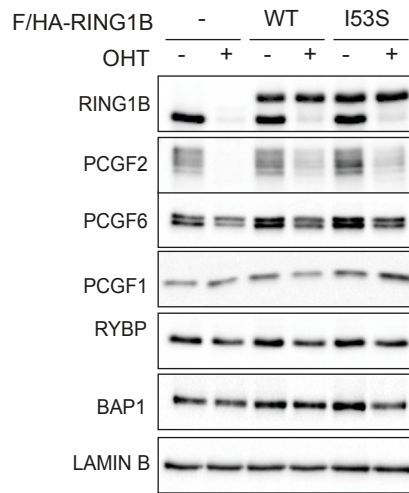

**B**

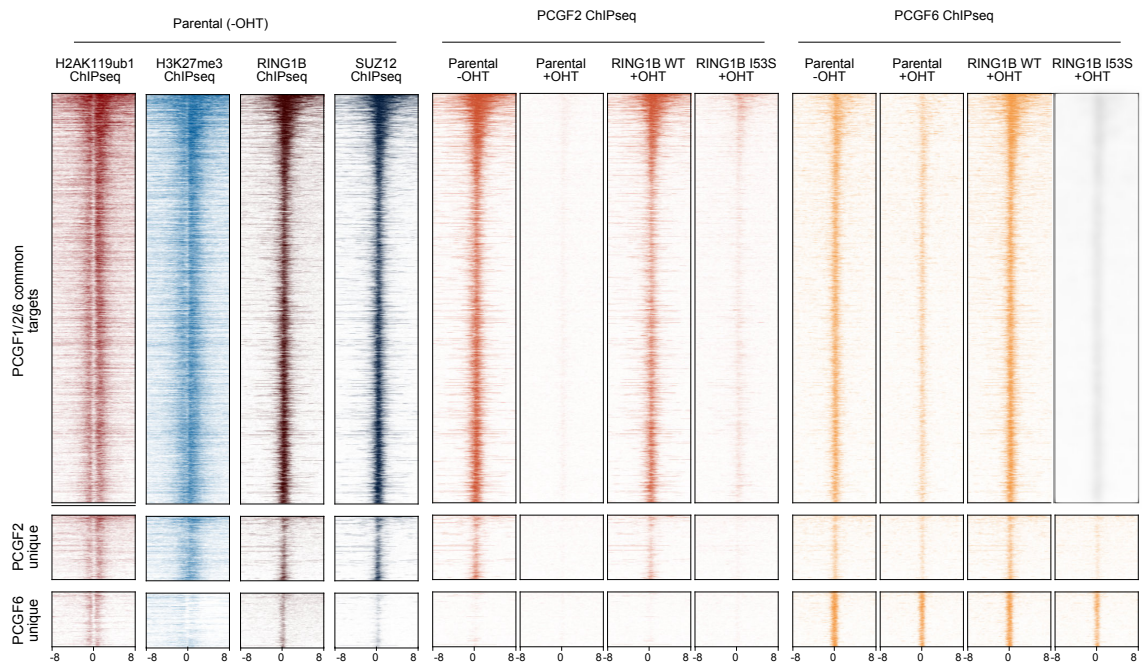

**C**

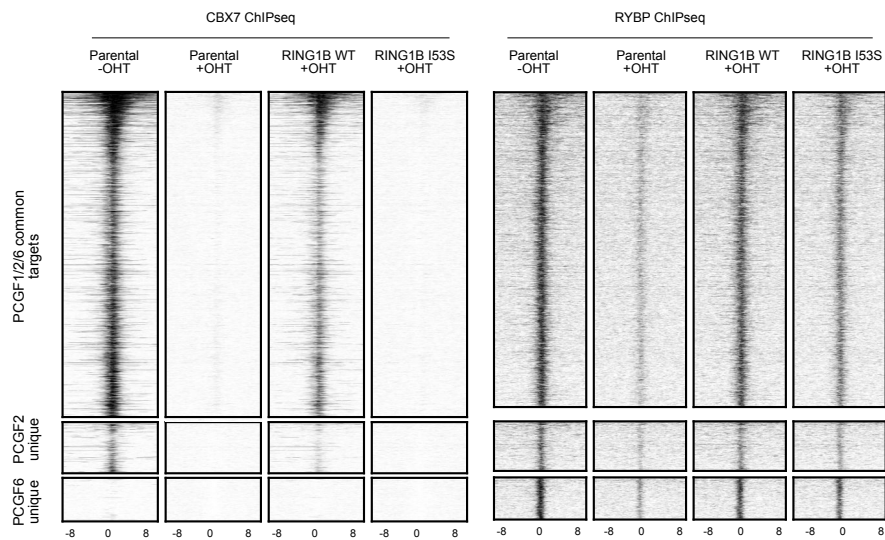

**Figure S2. Related to Figure 7.**

(A) Western blot analysis with the indicated antibodies of nuclear protein extracts obtained from the specified cell lines upon 72 hours of treatment with OHT (+OHT) or EtOH (-OHT). LAMIN B served as a negative control.

(B) Heatmaps representing normalized H2AK119ub1, H3K27me3, RING1B, SUZ12, PCGF2 and PCGF6 ChIP-seq intensities  $\pm$  8Kb around the TSS of PCGF target genes in the indicated cell lines.

(C) Heatmaps representing normalized CBX7 and RYBP ChIP-seq intensities  $\pm$  8Kb around the TSS of PCGF target genes in the indicated cell lines.

**Table S1. Mass spectrometry analysis of RING1B WT and I53S mutant partners.**

**Related to Figure 1**

Values of the LFQ ratios of the RING1B interactors obtained by MS/MS analyses in the FLAG-HA (F/HA)-tagged RING1B WT or I53S immuno-purifications (anti-FLAG) from mESCs.

**Table S2. ChIPseq targets. Related to Figure 1**

List of all RING1B and H2AK119ub1 peaks (target loci) found in WT +OHT cell line sorted by RING1B and H2AK119ub1 binding, respectively, and PCGFs target genes obtained from (31029542) liftOver to mm10 and sorted by RING1B binding.

**Table S3. RNAseq analysis upon loss of PRC1 enzymatic activity. Related to Figure 2**

List of all RefSeq genes and their corresponding RNA-seq results for the indicated cell lines at 72 hours from EtOH (-OHT) or OHT (+OHT) treatment.
